# Supplementary material
Source: publisher site journal article supplement (https://static.cambridge.org/content/id/urn:cambridge.org:id:article:S0007114520002330/resource/name/S0007114520002330supp001.docx)
Supplement: Supplementary file 1 [file S0007114520002330supp001.docx]

**Healthy and Unhealthy Dietary Patterns and Chronic Disease: An Umbrella Review of Meta-Analyses of Prospective Cohort Studies**

**Supplementary material** including **Supplementary** Tables 1-5, Supplementary References, and PRISMA checklists

**Supplementary Table 1**. Search strategy to find published meta-analyses of dietary patterns and chronic diseases (September/5/2019)

| **PubMed** (710) |
| --- |
| (((("Food Habits") OR ("Food Habit") OR ("dietary Habits") OR ("dietary Habit") OR ("dietary pattern") OR ("dietary patterns") OR ("Western pattern") OR ("Prudent pattern") OR ("conservative pattern") OR ("traditional pattern") OR ("eating pattern") OR ("eating patterns") OR ("food intake pattern") OR ("food intake patterns") OR ("healthy pattern") OR ("unhealthy pattern") OR ("healthy dietary pattern") OR ("unhealthy dietary pattern") OR ("western dietary pattern") OR ("Prudent dietary pattern") OR ("traditional dietary pattern") OR ("conservative dietary pattern") OR (vegetarian) OR (“plant-based”)))) AND ((("systematic review") OR ("meta-analysis"))) |
| **Scopus** (773) |
| TITLE-ABS("Food Habits") OR TITLE-ABS ("Food Habit") OR TITLE-ABS("dietary Habits") OR TITLE-ABS("dietary Habit") OR TITLE-ABS("dietary pattern") OR TITLE-ABS("dietary patterns") OR TITLE-ABS("Western pattern") OR TITLE-ABS("Prudent pattern") OR TITLE-ABS("conservative pattern") OR TITLE-ABS("traditional pattern") OR TITLE-ABS("eating pattern") OR TITLE-ABS("eating patterns") OR TITLE-ABS("food intake pattern") OR TITLE-ABS("food intake patterns") OR TITLE-ABS("healthy pattern") OR TITLE-ABS("unhealthy pattern") OR TITLE-ABS("healthy dietary pattern") OR TITLE-ABS("unhealthy dietary pattern") OR TITLE-ABS("western dietary pattern") OR TITLE-ABS("Prudent dietary pattern") OR TITLE-ABS("traditional dietary pattern") OR TITLE-ABS("conservative dietary pattern")OR TITLE-ABS(vegetarian)OR TITLE-ABS(“plant-based”)ANDTITLE-ABS("systematic review") OR TITLE-ABS("meta-analysis") |

**Supplementary Table 2**. List of excluded studies.

| **Reason for exclusion** |
| --- |
| In patients ([1](#_ENREF_1); [2](#_ENREF_2); [3](#_ENREF_3)) |
| Meta-analyses of studies other than prospective cohort studies ([4](#_ENREF_4); [5](#_ENREF_5); [6](#_ENREF_6); [7](#_ENREF_7); [8](#_ENREF_8); [9](#_ENREF_9); [10](#_ENREF_10); [11](#_ENREF_11); [12](#_ENREF_12)) |
| Meta-analyses with only one prospective cohort study ([13](#_ENREF_13); [14](#_ENREF_14); [15](#_ENREF_15); [16](#_ENREF_16)) |
| Not relevant exposure ([17](#_ENREF_17)) |
| Systematic reviews without meta-analysis ([18](#_ENREF_18); [19](#_ENREF_19); [20](#_ENREF_20)) |
| Meta-analyses of vegetarians ([21](#_ENREF_21); [22](#_ENREF_22); [23](#_ENREF_23); [24](#_ENREF_24); [25](#_ENREF_25); [26](#_ENREF_26); [27](#_ENREF_27); [28](#_ENREF_28); [29](#_ENREF_29)) |
| Duplicates (meta-analyses that assessed the same outcome) ([30](#_ENREF_30); [31](#_ENREF_31); [32](#_ENREF_32); [33](#_ENREF_33); [34](#_ENREF_34); [35](#_ENREF_35); [36](#_ENREF_36); [37](#_ENREF_37); [38](#_ENREF_38); [39](#_ENREF_39); [40](#_ENREF_40); [41](#_ENREF_41); [42](#_ENREF_42); [43](#_ENREF_43); [44](#_ENREF_44); [45](#_ENREF_45); [46](#_ENREF_46); [47](#_ENREF_47); [48](#_ENREF_48); [49](#_ENREF_49); [50](#_ENREF_50); [51](#_ENREF_51); [52](#_ENREF_52); [53](#_ENREF_53); [54](#_ENREF_54)) |

**Supplementary Table 3.** Detailed evaluation of the methodological quality with AMSTAR1.

| **Author (ref), year** | **Outcome** | **Q1**2 | **Q2** | **Q3** | **Q4** | **Q5** | **Q6** | **Q7** | **Q8** | **Q9** | **Q10** | **Q11** | **All** |
| --- | --- | --- | --- | --- | --- | --- | --- | --- | --- | --- | --- | --- | --- |
| Alhazmi 29, 2014 | Type 2 diabetes | Yes | Yes | Yes | Yes | No | Yes | Yes | No | Yes | Yes | Yes | 9 |
| Esposito 30, 2014 | Type 2 diabetes | Yes | Yes | Yes | CA | No | Yes | Yes | No | Yes | Yes | Yes | 8 |
| Fabiani 31, 2019 | Fracture | Yes | Yes | Yes | CA | Yes | Yes | Yes | No | Yes | Yes | Yes | 8 |
| Fabiani 32, 2019 | Metabolic syndrome | Yes | Yes | Yes | CA | Yes | Yes | Yes | No | Yes | Yes | Yes | 8 |
| Garcia-Larsen 33, 2018 | Colorectal cancer | Yes | No | Yes | Yes | No | Yes | Yes | No | Yes | Yes | Yes | 8 |
| Godos 34, 2016 | Colorectal adenoma | Yes | Yes | Yes | CA | No | Yes | Yes | No | Yes | Yes | Yes | 8 |
| Grosso 35, 2017 | Pancreatic, gastric, and prostate cancers | Yes | Yes | Yes | No | No | Yes | No | Yes | Yes | Yes | Yes | 8 |
| Hou 36, 2015 | Coronary heart disease | Yes | Yes | Yes | CA | No | Yes | Yes | No | Yes | Yes | Yes | 8 |
| Li 37, 2015 | All-cause and cardiovascular mortality | Yes | Yes | No | No | No | Yes | No | No | Yes | Yes | Yes | 6 |
| Lv 38, 2014 | Asthma | Yes | Yes | Yes | CA | No | Yes | Yes | No | Yes | Yes | Yes | 8 |
| Molendijk 39, 2018 | Depression | Yes | No | Yes | CA | No | Yes | Yes | No | Yes | Yes | Yes | 7 |
| Rashidi Pour Fard 40, 2019 | Frailty | Yes | Yes | Yes | CA | No | Yes | Yes | No | Yes | Yes | Yes | 8 |
| Rodríguez-Monforte 41, 2015 | Stroke | Yes | Yes | No | No | No | Yes | Yes | No | Yes | Yes | Yes | 7 |
| Sun 42, 2016 | Lung cancer | Yes | Yes | Yes | CA | No | Yes | Yes | Yes | Yes | Yes | Yes | 9 |
| Xiao 43, 2019 | Breast cancer | Yes | Yes | Yes | CA | Yes | Yes | Yes | Yes | Yes | Yes | Yes | 10 |
| Zheng 44, 2016 | Chronic obstructive pulmonary disease | Yes | Yes | Yes | No | No | Yes | Yes | No | Yes | Yes | Yes | 8 |
| 1Reference numbers are related to the main text.  2 Q1: Was an ‚a priori‘ design provided?, Q2: Was there duplicate study selection and data extraction?, Q3: Was a comprehensive literature search performed?, Q4: Was the status of publication (i.e. grey literature) used as an inclusion criterion?, Q5: Was a list of studies (included and excluded) provided?, Q6: Were the characteristics of the included studies provided?, Q7: Was the scientific quality of the included studies assessed and documented?, Q8: Was the scientific quality of the included studies used appropriately in formulation conclusions?, Q9: Were the methods used to combine the findings of studies appropriate?, Q10: Was the likelihood of publication bias assessed?, Q11: Was the conflict of interest included?  **Abbreviations**:CA, can’t answer; Q, Question; ref, reference number in the main text. | | | | | | | | | | | | | |

**Supplementary Table 4**: Scoring for the different components of NutriGrade for each outcome1.

| **Author (ref), year** | **Exposure** | **Outcome** | **Risk of bias**2 | **Precision**3 | **Heterogeneity**4 | **Directness**5 | **Publication bias**6 | **Funding bias**7 | **Effect size**8 | **Dose-response**9 | **Sum** | **NutriGrade** |
| --- | --- | --- | --- | --- | --- | --- | --- | --- | --- | --- | --- | --- |
| Alhazmi 29, 2014 | Unhealthy pattern | Type 2 diabetes | 1.5 | 1 | 0.8 | 1 | 1 | 1 | 1 | 0 | 7.3 | Moderate |
| Esposito 30, 2014 | Healthy  pattern | Type 2 diabetes | 2 | 1 | 0.8 | 1 | 1 | 0.5 | 0 | 0 | 6.3 | Moderate |
| Fabiani 31, 2019 | Healthy pattern | Fracture | 1.5 | 1 | 0.4 | 1 | 0.5 | 1 | 1 | 0 | 6.4 | Moderate |
| Fabiani 31, 2019 | Unhealthy pattern | Fracture | 1.5 | 1 | 0.4 | 1 | 0.5 | 1 | 1 | 0 | 6.4 | Moderate |
| Fabiani 32, 2019 | Healthy pattern | Metabolic syndrome | 1.5 | 1 | 0.6 | 1 | 0 | 1 | 0 | 0 | 5.1 | Low |
| Fabiani 32, 2019 | Unhealthy pattern | Metabolic syndrome | 1.5 | 1 | 0.6 | 1 | 0 | 1 | 1 | 0 | 6.1 | Moderate |
| Garcia-Larsen 33, 2018 | Healthy pattern | Colorectal cancer | 2 | 1 | 0.6 | 1 | 1 | 1 | 0 | 0 | 6.6 | Moderate |
| Garcia-Larsen 33, 2018 | Unhealthy pattern | Colorectal cancer | 2 | 0 | 0.6 | 1 | 1 | 1 | 0 | 0 | 5.6 | Low |
| Godos 34, 2016 | Healthy pattern | Colorectal adenoma | 1.5 | 0 | 0.5 | 1 | 0 | 1 | 0 | 0 | 4 | Low |
| Godos 34, 2016 | Unhealthy pattern | Colorectal adenoma | 1.5 | 0 | 0.5 | 1 | 0 | 1 | 1 | 0 | 5 | Low |
| Godos 34, 2016 | Healthy pattern | Pancreatic cancer | 1.5 | 0 | 0.2 | 1 | 0 | 1 | 0 | 0 | 3.7 | Very low |
| Godos 34, 2016 | Unhealthy pattern | Pancreatic cancer | 1.5 | 0 | 0.4 | 1 | 0 | 1 | 0 | 0 | 3.9 | Very low |
| Grosso 35, 2017 | Healthy pattern | Pancreatic cancer | 1.5 | 0 | 0.3 | 1 | 0 | 1 | 0 | 0 | 3.8 | Very low |
| Grosso 35, 2017 | Unhealthy pattern | Pancreatic cancer | 1.5 | 0 | 0.3 | 1 | 0 | 1 | 0 | 0 | 3.8 | Very low |
| Grosso 35, 2017 | Healthy pattern | Prostate cancer | 1 | 0 | 0.5 | 1 | 0 | 1 | 0 | 0 | 3.5 | Very low |
| Grosso 35, 2017 | Unhealthy pattern | Prostate cancer | 1 | 0 | 0.3 | 1 | 0 | 1 | 0 | 0 | 3.3 | Very low |
| Hou 36, 2015 | Healthy pattern | Coronary heart disease | 1.5 | 1 | 0.6 | 1 | 0.5 | 1 | 0 | 0 | 5.6 | Low |
| Hou 36, 2015 | Unhealthy pattern | Coronary heart disease | 1.5 | 1 | 0.5 | 1 | 0.5 | 1 | 0 | 0 | 5.5 | Low |
| Li 37, 2015 | Healthy pattern | All-cause mortality | 1.5 | 1 | 0.4 | 1 | 0 | 1 | 1 | 0 | 5.9 | Low |
| Li 37, 2015 | Unhealthy pattern | All-cause mortality | 1.5 | 1 | 0.4 | 1 | 0.5 | 1 | 0 | 0 | 5.4 | Low |
| Li 37, 2015 | Healthy pattern | Cardiovascular mortality | 1.5 | 1 | 0.6 | 1 | 0.5 | 1 | 0 | 0 | 5.6 | Low |
| Li 37, 2015 | Unhealthy pattern | Cardiovascular mortality | 1.5 | 0 | 0.4 | 1 | 0.5 | 1 | 0 | 0 | 4.4 | Low |
| Lv 38, 2014 | Healthy pattern | Asthma | 1 | 0 | 0.5 | 0 | 0 | 1 | 0 | 0 | 2.2 | Very low |
| Lv 38, 2014 | Unhealthy pattern | Asthma | 1 | 0 | 0.2 | 0 | 0 | 1 | 0 | 0 | 2.2 | Very low |
| Molendijk 39, 2018 | Healthy pattern | Depression | 1 | 0 | 0.5 | 1 | 0.5 | 1 | 0 | 0 | 4 | Low |
| Molendijk 39, 2018 | Unhealthy pattern | Depression | 1 | 0 | 0.4 | 1 | 0.5 | 1 | 0 | 0 | 3.9 | Very low |
| Rashidi Pour Fard 40,  2019 | Healthy pattern | Frailty | 1.5 | 0 | 0.4 | 1 | 0 | 1 | 0 | 0 | 3.9 | Very low |
| Rodríguez-Monforte 41, 2015 | Healthy pattern | Stroke | 1.5 | 0 | 0.5 | 1 | 0.5 | 1 | 0 | 0 | 4.5 | Low |
| Rodríguez-Monforte 41, 2015 | Unhealthy pattern | Stroke | 1.5 | 0 | 0.8 | 1 | 0.5 | 1 | 0 | 0 | 4.8 | Low |
| Sun 42, 2016 | Healthy pattern | lung cancer | 1 | 0 | 0.4 | 0 | 0 | 1 | 1 | 0 | 3.4 | Very low |
| Xiao 43, 2019 | Healthy pattern | Breast cancer | 1.5 | 1 | 0.8 | 1 | 1 | 1 | 0 | 0 | 6.3 | Moderate |
| Xiao 43, 2019 | Unhealthy pattern | Breast cancer | 1.5 | 0 | 0.5 | 1 | 1 | 1 | 0 | 0 | 5 | Low |
| Zheng 44, 2016 | Healthy pattern | Chronic obstructive pulmonary disease | 1.5 | 0 | 0.5 | 0 | 0 | 1 | 1 | 0 | 4 | Low |
| Zheng 44, 2016 | Western pattern | Chronic obstructive pulmonary disease | 1.5 | 0 | 0.2 | 0 | 0 | 1 | 0 | 0 | 2.7 | Very low |
| 1Reference numbers are related to the main text.  2 Modifications of original NutriGrade-scoring system: Study quality Newcastle Ottawa Scale: ≥8 (2 points); ≥7-<8 (1.5 points), ≥6-<7(1 point).  3 Modifications of original NutriGrade-scoring system: >5000 cases and the 95%CI excludes the null value (1 point), <5000 cases or >5000 cases but 95%CI includes the null value (0 point).  4 0 to 1 point on the basis of *I*2.  5 No important differences in the population or hard clinical outcomes (1 point), important differences in the population (0 point).  6 <5 studies or sever evidence of bias or publication bias not assessed (0 point), no evidence of bias for 5-9 studies or moderate evidence of bias for ≥10 studies (0.5 point), no evidence of bias for ≥10 studies (1 point).  7 Funded by academic institutions or research institutions (1 point), funded by private institutions, foundations, or nongovernmental organizations (0.5 point), Industry funding or conflict of interest (0 point).  8 No effect (RR: 0.80–1.20) when comparing the highest vs. lowest category (0 point), moderate effect size (RR: <0.80–0.50 and >1.20–2, and corresponding test is statistically significant) when comparing the highest vs. lowest category (0.5 point), large effect size (RR: <0.50 and >2.00, and corresponding test is statistically significant) when comparing the highest vs. lowest category (1 point).  9 No dose-response analysis or dose-response analysis with corresponding statistical test nonsignificant (0 point), significant linear or nonlinear dose-response relationship (1 point). | | | | | | | | | | | | |

**Supplementary References:**

1. Jochems SHJ, Van Osch FHM, Bryan RT *et al.* (2017) Impact of dietary patterns and the main food groups on mortality and recurrence in cancer survivors: A systematic review of current epidemiological literature. *BMJ open* **8**.

2. Kelly JT, Palmer SC, Wai SN *et al.* (2017) Healthy Dietary Patterns and Risk of Mortality and ESRD in CKD: A Meta-Analysis of Cohort Studies. *Clinical journal of the American Society of Nephrology : CJASN* **12**, 272-279.

3. Schwedhelm C, Boeing H, Hoffmann G *et al.* (2016) Effect of diet on mortality and cancer recurrence among cancer survivors: a systematic review and meta-analysis of cohort studies. *Nutrition reviews* **74**, 737-748.

4. Arab A, Rafie N, Mansourian M *et al.* (2018) Dietary patterns and semen quality: a systematic review and meta-analysis of observational studies. *Andrology* **6**, 20-28.

5. Del-Ponte B, Quinte GC, Cruz S *et al.* (2019) Dietary patterns and attention deficit/hyperactivity disorder (ADHD): A systematic review and meta-analysis. *Journal of affective disorders* **252**, 160-173.

6. Haghighatdoost F, Bellissimo N, Totosy de Zepetnek JO *et al.* (2017) Association of vegetarian diet with inflammatory biomarkers: a systematic review and meta-analysis of observational studies. *Public health nutrition* **20**, 2713-2721.

7. Liu X, Wang X, Lin S *et al.* (2014) Dietary patterns and oesophageal squamous cell carcinoma: a systematic review and meta-analysis. *British journal of cancer* **110**, 2785-2795.

8. Rezagholizadeh F, Djafarian K, Khosravi S *et al.* (2017) A posteriori healthy dietary patterns may decrease the risk of central obesity: findings from a systematic review and meta-analysis. *Nutrition research (New York, NY)* **41**, 1-13.

9. Yokoyama Y, Levin SM, Barnard ND (2017) Association between plant-based diets and plasma lipids: a systematic review and meta-analysis. *Nutrition reviews* **75**, 683-698.

10. Yokoyama Y, Nishimura K, Barnard ND *et al.* (2014) Vegetarian diets and blood pressure: a meta-analysis. *JAMA internal medicine* **174**, 577-587.

11. Zeng LF, Yang WY, Liang GH *et al.* (2019) Can increasing the prevalence of vegetable-based diets lower the risk of osteoporosis in postmenopausal subjects? A systematic review with meta-analysis of the literature. *Complementary therapies in medicine* **42**, 302-311.

12. Zhang Z, Ma G, Chen S *et al.* (2013) Comparison of plasma triacylglycerol levels in vegetarians and omnivores: a meta-analysis. *Nutrition (Burbank, Los Angeles County, Calif)* **29**, 426-430.

13. Mu M, Xu LF, Hu D *et al.* (2017) Dietary Patterns and Overweight/Obesity: A Review Article. *Iranian journal of public health* **46**, 869-876.

14. Si CJ, Shu L, Zheng PF *et al.* (2017) Dietary patterns and endometrial cancer: a meta-analysis. *European journal of cancer prevention : the official journal of the European Cancer Prevention Organisation (ECP)* **26**, 336-345.

15. Wang CJ, Shen YX, Liu Y (2016) Empirically Derived Dietary Patterns and Hypertension Likelihood: A Meta-Analysis. *Kidney & blood pressure research* **41**, 570-581.

16. Wang HF, Yao AL, Sun YY *et al.* (2018) Empirically derived dietary patterns and ovarian cancer risk: a meta-analysis. *European journal of cancer prevention : the official journal of the European Cancer Prevention Organisation (ECP)* **27**, 493-501.

17. Tolkien K, Bradburn S, Murgatroyd C (2018) An anti-inflammatory diet as a potential intervention for depressive disorders: A systematic review and meta-analysis. *Clinical nutrition (Edinburgh, Scotland)*.

18. Pan P, Yu J, Wang LS (2019) Diet and colon: What matters? *Current Opinion in Gastroenterology* **35**, 101-106.

19. Sanches Machado D’Almeida K, Ronchi Spillere S, Zuchinali P *et al.* (2018) Mediterranean diet and other dietary patterns in primary prevention of heart failure and changes in cardiac function markers: A systematic review. *Nutrients* **10**.

20. Sherzai A, Heim LT, Boothby C *et al.* (2012) Stroke, food groups, and dietary patterns: a systematic review. *Nutrition reviews* **70**, 423-435.

21. Dinu M, Abbate R, Gensini GF *et al.* (2017) Vegetarian, vegan diets and multiple health outcomes: A systematic review with meta-analysis of observational studies. *Critical reviews in food science and nutrition* **57**, 3640-3649.

22. Glenn AJ, Viguiliouk E, Seider M *et al.* (2019) Relation of Vegetarian Dietary Patterns With Major Cardiovascular Outcomes: A Systematic Review and Meta-Analysis of Prospective Cohort Studies. *Frontiers in nutrition* **6**, 80.

23. Godos J, Bella F, Sciacca S *et al.* (2017) Vegetarianism and breast, colorectal and prostate cancer risk: an overview and meta-analysis of cohort studies. *Journal of human nutrition and dietetics : the official journal of the British Dietetic Association* **30**, 349-359.

24. Ho-Pham LT, Nguyen ND, Nguyen TV (2009) Effect of vegetarian diets on bone mineral density: a Bayesian meta-analysis. *The American journal of clinical nutrition* **90**, 943-950.

25. Huang T, Yang B, Zheng J *et al.* (2012) Cardiovascular disease mortality and cancer incidence in vegetarians: a meta-analysis and systematic review. *Annals of nutrition & metabolism* **60**, 233-240.

26. Iguacel I, Miguel-Berges ML, Gomez-Bruton A *et al.* (2019) Veganism, vegetarianism, bone mineral density, and fracture risk: a systematic review and meta-analysis. *Nutrition reviews* **77**, 1-18.

27. Key TJ, Fraser GE, Thorogood M *et al.* (1999) Mortality in vegetarians and nonvegetarians: detailed findings from a collaborative analysis of 5 prospective studies. *The American journal of clinical nutrition* **70**, 516s-524s.

28. Lee Y, Park K (2017) Adherence to a Vegetarian Diet and Diabetes Risk: A Systematic Review and Meta-Analysis of Observational Studies. *Nutrients* **9**.

29. Picasso MC, Lo-Tayraco JA, Ramos-Villanueva JM *et al.* (2019) Effect of vegetarian diets on the presentation of metabolic syndrome or its components: A systematic review and meta-analysis. *Clinical nutrition (Edinburgh, Scotland)* **38**, 1117-1132.

30. Albuquerque RC, Baltar VT, Marchioni DM (2014) Breast cancer and dietary patterns: a systematic review. *Nutrition reviews* **72**, 1-17.

31. Alizadeh S, Djafarian K, Alizadeh M *et al.* (2019) The relation of healthy and Western dietary patterns to the risk of endometrial and ovarian cancers: a systematic review and meta-analysis. *International journal for vitamin and nutrition research Internationale Zeitschrift fur Vitamin- und Ernahrungsforschung Journal international de vitaminologie et de nutrition*, 1-11.

32. Alizadeh S, Shab-Bidar S, Mohtavinejad N *et al.* (2017) A posteriori dietary patterns and risk of pancreatic and renal cancers: A systematic review and meta-analysis. *Nutrition and Food Science* **47**, 839-868.

33. Bertuccio P, Rosato V, Andreano A *et al.* (2013) Dietary patterns and gastric cancer risk: a systematic review and meta-analysis. *Annals of oncology : official journal of the European Society for Medical Oncology* **24**, 1450-1458.

34. Brennan SF, Cantwell MM, Cardwell CR *et al.* (2010) Dietary patterns and breast cancer risk: a systematic review and meta-analysis. *The American journal of clinical nutrition* **91**, 1294-1302.

35. Denova-Gutiérrez E, Méndez-Sánchez L, Muñoz-Aguirre P *et al.* (2018) Dietary patterns, bone mineral density, and risk of fractures: A systematic review and meta-analysis. *Nutrients* **10**.

36. Esposito K, Kastorini CM, Panagiotakos DB *et al.* (2010) Prevention of type 2 diabetes by dietary patterns: a systematic review of prospective studies and meta-analysis. *Metabolic syndrome and related disorders* **8**, 471-476.

37. Fabiani R, Minelli L, Bertarelli G *et al.* (2016) A Western Dietary Pattern Increases Prostate Cancer Risk: A Systematic Review and Meta-Analysis. *Nutrients* **8**.

38. Feng YL, Shu L, Zheng PF *et al.* (2017) Dietary patterns and colorectal cancer risk: a meta-analysis. *European journal of cancer prevention : the official journal of the European Cancer Prevention Organisation (ECP)* **26**, 201-211.

39. Jannasch F, Kroger J, Schulze MB (2017) Dietary Patterns and Type 2 Diabetes: A Systematic Literature Review and Meta-Analysis of Prospective Studies. *The Journal of nutrition* **147**, 1174-1182.

40. Kontogianni MD, Panagiotakos DB (2014) Dietary patterns and stroke: a systematic review and re-meta-analysis. *Maturitas* **79**, 41-47.

41. Lai JS, Hiles S, Bisquera A *et al.* (2014) A systematic review and meta-analysis of dietary patterns and depression in community-dwelling adults. *The American journal of clinical nutrition* **99**, 181-197.

42. Li Y, Lv MR, Wei YJ *et al.* (2017) Dietary patterns and depression risk: A meta-analysis. *Psychiatry research* **253**, 373-382.

43. Lu PY, Shu L, Shen SS *et al.* (2017) Dietary Patterns and Pancreatic Cancer Risk: A Meta-Analysis. *Nutrients* **9**.

44. Magalhaes B, Peleteiro B, Lunet N (2012) Dietary patterns and colorectal cancer: systematic review and meta-analysis. *European journal of cancer prevention : the official journal of the European Cancer Prevention Organisation (ECP)* **21**, 15-23.

45. Maghsoudi Z, Ghiasvand R, Salehi-Abargouei A (2016) Empirically derived dietary patterns and incident type 2 diabetes mellitus: a systematic review and meta-analysis on prospective observational studies. *Public health nutrition* **19**, 230-241.

46. McEvoy CT, Cardwell CR, Woodside JV *et al.* (2014) A posteriori dietary patterns are related to risk of type 2 diabetes: findings from a systematic review and meta-analysis. *Journal of the Academy of Nutrition and Dietetics* **114**, 1759-1775.e1754.

47. Mente A, de Koning L, Shannon HS *et al.* (2009) A systematic review of the evidence supporting a causal link between dietary factors and coronary heart disease. *Archives of internal medicine* **169**, 659-669.

48. Qian F, Liu G, Hu FB *et al.* (2019) Association Between Plant-Based Dietary Patterns and Risk of Type 2 Diabetes: A Systematic Review and Meta-analysis. *JAMA internal medicine*.

49. Rahe C, Unrath M, Berger K (2014) Dietary patterns and the risk of depression in adults: a systematic review of observational studies. *European journal of nutrition* **53**, 997-1013.

50. Rodriguez-Monforte M, Sanchez E, Barrio F *et al.* (2017) Metabolic syndrome and dietary patterns: a systematic review and meta-analysis of observational studies. *European journal of nutrition* **56**, 925-947.

51. Shu L, Wang XQ, Wang SF *et al.* (2013) Dietary patterns and stomach cancer: a meta-analysis. *Nutrition and cancer* **65**, 1105-1115.

52. Zhang X, Shu L, Si C *et al.* (2015) Dietary Patterns and Risk of Stroke in Adults: A Systematic Review and Meta-analysis of Prospective Cohort Studies. *Journal of stroke and cerebrovascular diseases : the official journal of National Stroke Association* **24**, 2173-2182.

53. Zhang XY, Shu L, Si CJ *et al.* (2015) Dietary Patterns, Alcohol Consumption and Risk of Coronary Heart Disease in Adults: A Meta-Analysis. *Nutrients* **7**, 6582-6605.

54. Zheng J, Guinter MA, Merchant AT *et al.* (2017) Dietary patterns and risk of pancreatic cancer: a systematic review. *Nutrition reviews* **75**, 883-908.

| **Section/topic** | **#** | **Checklist item** | **Reported on page #** |
| --- | --- | --- | --- |
| **TITLE** | | |  |
| Title | 1 | Identify the report as a systematic review, meta-analysis, or both. | 1 |
| **ABSTRACT** | | |  |
| Structured summary | 2 | Provide a structured summary including, as applicable: background; objectives; data sources; study eligibility criteria, participants, and interventions; study appraisal and synthesis methods; results; limitations; conclusions and implications of key findings; systematic review registration number. | 2,3 |
| **INTRODUCTION** | | |  |
| Rationale | 3 | Describe the rationale for the review in the context of what is already known. | 4-5 |
| Objectives | 4 | Provide an explicit statement of questions being addressed with reference to participants, interventions, comparisons, outcomes, and study design (PICOS). | 5 |
| **METHODS** | | |  |
| Protocol and registration | 5 | Indicate if a review protocol exists, if and where it can be accessed (e.g., Web address), and, if available, provide registration information including registration number. | None. |
| Eligibility criteria | 6 | Specify study characteristics (e.g., PICOS, length of follow-up) and report characteristics (e.g., years considered, language, publication status) used as criteria for eligibility, giving rationale. | 6 |
| Information sources | 7 | Describe all information sources (e.g., databases with dates of coverage, contact with study authors to identify additional studies) in the search and date last searched. | 5-6 |
| Search | 8 | Present full electronic search strategy for at least one database, including any limits used, such that it could be repeated. | Supplementary Table 1 |
| Study selection | 9 | State the process for selecting studies (i.e., screening, eligibility, included in systematic review, and, if applicable, included in the meta-analysis). | 9, and Figure 1 |
| Data collection process | 10 | Describe method of data extraction from reports (e.g., piloted forms, independently, in duplicate) and any processes for obtaining and confirming data from investigators. | 6-7 |
| Data items | 11 | List and define all variables for which data were sought (e.g., PICOS, funding sources) and any assumptions and simplifications made. | 6-7 |
| Risk of bias in individual studies | 12 | Describe methods used for assessing risk of bias of individual studies (including specification of whether this was done at the study or outcome level), and how this information is to be used in any data synthesis. | 7-8 |
| Summary measures | 13 | State the principal summary measures (e.g., risk ratio, difference in means). | 8 |
| Synthesis of results | 14 | Describe the methods of handling data and combining results of studies, if done, including measures of consistency (e.g., I2) for each meta-analysis. | 8-9 |

Page 1 of 2

| **Section/topic** | **#** | **Checklist item** | **Reported on page #** |
| --- | --- | --- | --- |
| Risk of bias across studies | 15 | Specify any assessment of risk of bias that may affect the cumulative evidence (e.g., publication bias, selective reporting within studies). | 8-9 |
| Additional analyses | 16 | Describe methods of additional analyses (e.g., sensitivity or subgroup analyses, meta-regression), if done, indicating which were pre-specified. | Not applicable |
| **RESULTS** | | |  |
| Study selection | 17 | Give numbers of studies screened, assessed for eligibility, and included in the review, with reasons for exclusions at each stage, ideally with a flow diagram. | 9, Figure 1 |
| Study characteristics | 18 | For each study, present characteristics for which data were extracted (e.g., study size, PICOS, follow-up period) and provide the citations. | Table 2 |
| Risk of bias within studies | 19 | Present data on risk of bias of each study and, if available, any outcome level assessment (see item 12). | Tables 2-5 |
| Results of individual studies | 20 | For all outcomes considered (benefits or harms), present, for each study: (a) simple summary data for each intervention group (b) effect estimates and confidence intervals, ideally with a forest plot. | Tables 2-5 |
| Synthesis of results | 21 | Present results of each meta-analysis done, including confidence intervals and measures of consistency. | Tables 2-5 |
| Risk of bias across studies | 22 | Present results of any assessment of risk of bias across studies (see Item 15). | Tables 2-5 |
| Additional analysis | 23 | Give results of additional analyses, if done (e.g., sensitivity or subgroup analyses, meta-regression [see Item 16]). | Tables 2-5 |
| **DISCUSSION** | | |  |
| Summary of evidence | 24 | Summarize the main findings including the strength of evidence for each main outcome; consider their relevance to key groups (e.g., healthcare providers, users, and policy makers). | 13-17 |
| Limitations | 25 | Discuss limitations at study and outcome level (e.g., risk of bias), and at review-level (e.g., incomplete retrieval of identified research, reporting bias). | 18-19 |
| Conclusions | 26 | Provide a general interpretation of the results in the context of other evidence, and implications for future research. | 20-21 |
| **FUNDING** | | |  |
| Funding | 27 | Describe sources of funding for the systematic review and other support (e.g., supply of data); role of funders for the systematic review. | 21 |
